# Supplementary material
Source: PubMed Central journal article supplement (PMC4538487)
Supplement: AAC.05006-14_zac009154318so1.pdf [file AAC.05006-14_zac009154318so1.pdf]

SUPPLEMENTARY FIGURES.

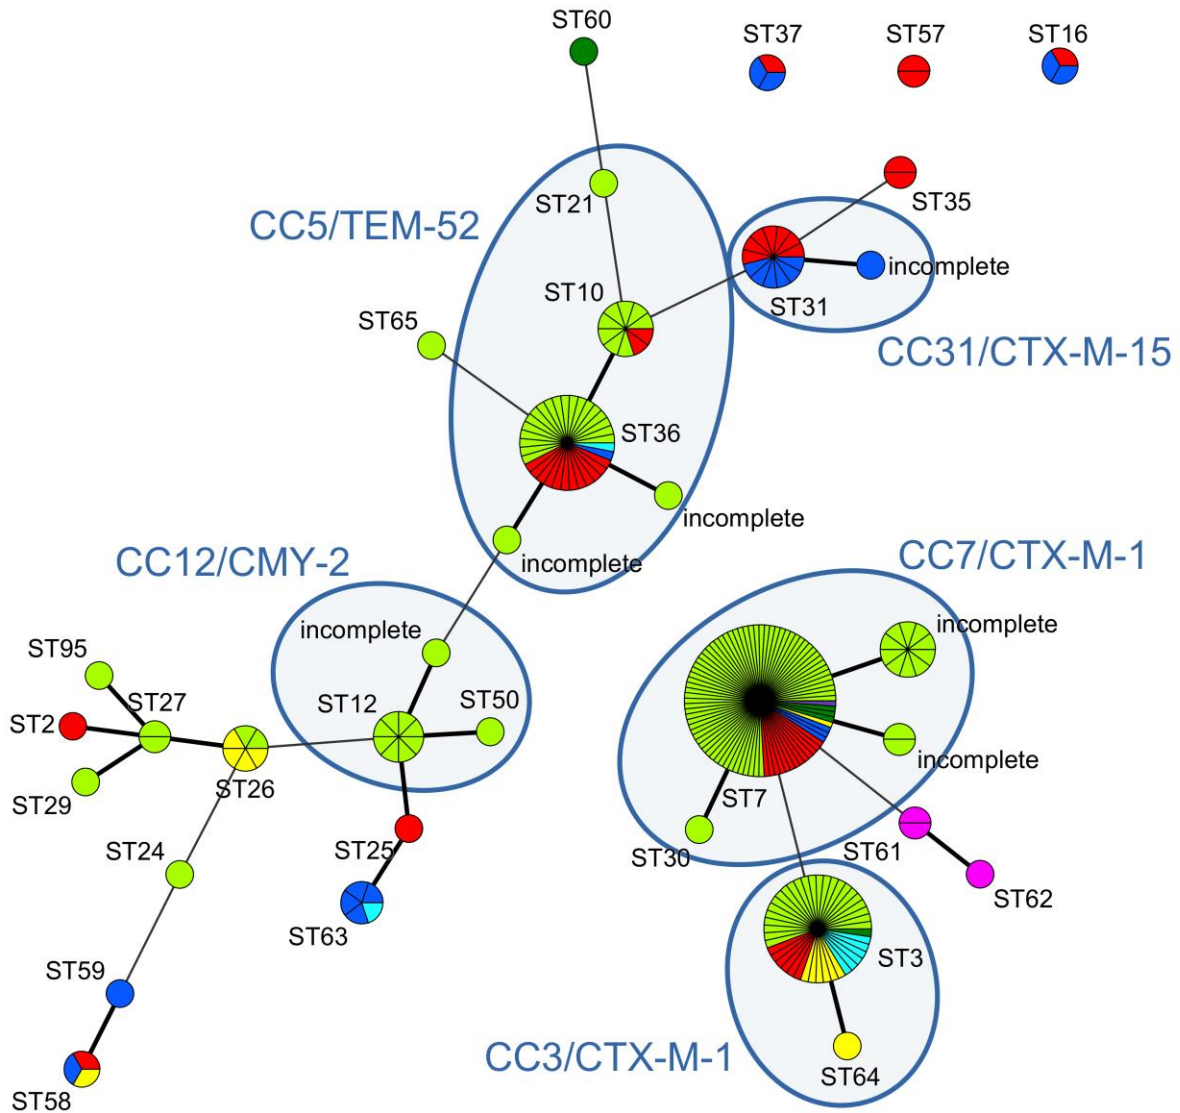

**FigS1**

pMLST analysis of 251 selected IncII-I $\gamma$  plasmids as visualized by Bionumerics 6.5. Plasmids with identical sequence types were assigned to one circle. Single locus variants are indicated by a thick line and double locus variants by a thin line. Sequence types belonging to one clonal complex are grouped by a blue circle. Colours indicate the animal source of the isolates containing the various plasmids.

Poultry: ■ Cattle: ■ Human: ■ Pig: ■ Turkey: ■ Horse: ■ Sheep: ■

Unknown: ■

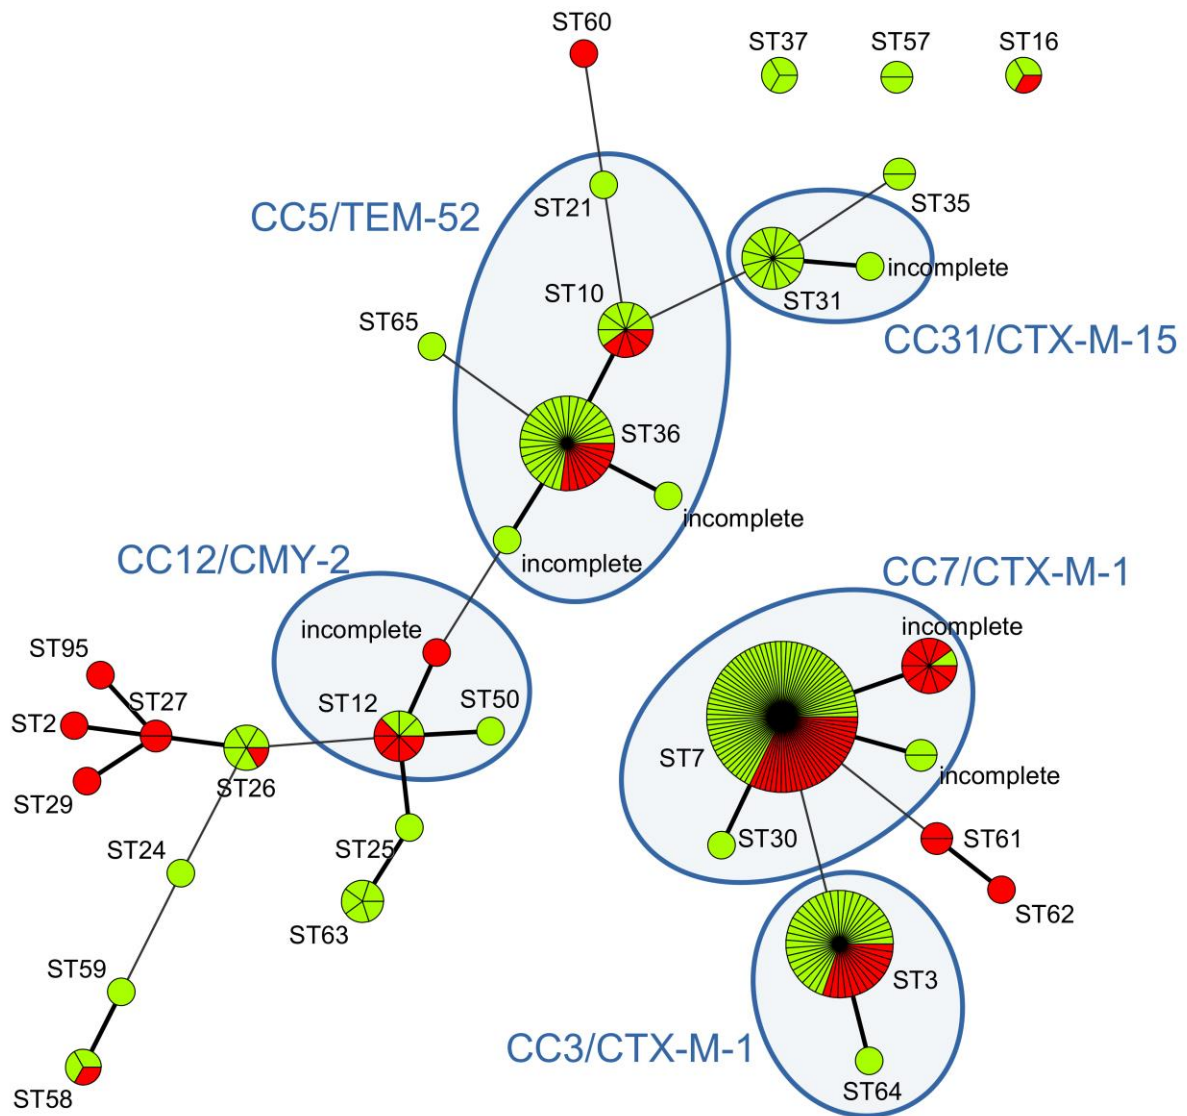

**FigS2**

pMLST analysis of 251 selected IncII-I $\gamma$  plasmids as visualized by Bionumerics 6.5. Plasmids with identical pMLST types were assigned to one circle. Single locus variants are indicated by a thick line and double locus variants by a thin line. Sequence types belonging to one clonal complex are grouped by a blue circle. Colours indicate whether the plasmids were obtained from *E.coli* ■ or from *Salmonella*. ■

Table S1

**Salmonella and *E. coli* isolates containing IncI1 plasmids carrying ESBL/AmpC encoding genes or a class I integron**

| Key      | Bacterial host    | Species | Year isolation | Country | ESBL/AmpC | pMLST<br>ST* | estimated<br>plasmid size (kb)** |
|----------|-------------------|---------|----------------|---------|-----------|--------------|----------------------------------|
| Sal-70   | <i>Salmonella</i> | Poultry | 2009           | G       | CMY-2     | incomplete   |                                  |
| ESBL-244 | <i>E. coli</i>    | Poultry | 2009           | G       | CMY-2     | ST12         |                                  |
| ESBL-318 | <i>E. coli</i>    | Poultry | 2008           | NL      | CMY-2     | ST12         | 95                               |
| ESBL-355 | <i>E. coli</i>    | Poultry | 2007           | NL      | CMY-2     | ST12         | 100                              |
| Sal-38   | <i>Salmonella</i> | Poultry | 2008           | NL      | CMY-2     | ST12         |                                  |
| Sal-4    | <i>Salmonella</i> | Poultry | 2008           | NL      | CMY-2     | ST12         |                                  |
| Sal-67   | <i>Salmonella</i> | Poultry | 2009           | G       | CMY-2     | ST12         |                                  |
| Sal-68   | <i>Salmonella</i> | Poultry | unknown        | G       | CMY-2     | ST12         |                                  |
| Sal-69   | <i>Salmonella</i> | Poultry | 2009           | G       | CMY-2     | ST12         |                                  |
| Sal-3    | <i>Salmonella</i> | Human   | 2008           | NL      | CMY-2     | ST2          |                                  |
| ESBL-243 | <i>E. coli</i>    | Poultry | 2009           | G       | CMY-2     | ST65         |                                  |
| E39.47   | <i>E. coli</i>    | Poultry | unknown        | NL      | CTX-M-1   | incomplete   |                                  |
| ESBL-302 | <i>E. coli</i>    | Poultry | 2008           | NL      | CTX-M-1   | incomplete   | 95                               |
| ESBL-315 | <i>E. coli</i>    | Poultry | 2008           | NL      | CTX-M-1   | incomplete   | 90                               |
| Sal-13   | <i>Salmonella</i> | Poultry | 2008           | NL      | CTX-M-1   | incomplete   |                                  |
| Sal-18   | <i>Salmonella</i> | Poultry | 2008           | NL      | CTX-M-1   | incomplete   |                                  |
| Sal-19   | <i>Salmonella</i> | Poultry | 2008           | NL      | CTX-M-1   | incomplete   |                                  |
| Sal-21   | <i>Salmonella</i> | Poultry | 2008           | NL      | CTX-M-1   | incomplete   |                                  |
| Sal-29   | <i>Salmonella</i> | Poultry | 2008           | NL      | CTX-M-1   | incomplete   |                                  |
| Sal-32   | <i>Salmonella</i> | Poultry | 2008           | NL      | CTX-M-1   | incomplete   |                                  |
| Sal-5    | <i>Salmonella</i> | Poultry | 2008           | NL      | CTX-M-1   | incomplete   |                                  |
| Sal-62   | <i>Salmonella</i> | Poultry | 2009           | G       | CTX-M-1   | incomplete   |                                  |
| Sal-8    | <i>Salmonella</i> | Poultry | 2008           | NL      | CTX-M-1   | incomplete   |                                  |
| ESBL-197 | <i>E. coli</i>    | Poultry | 2009           | G       | CTX-M-1   | ST10         |                                  |
| ESBL-148 | <i>E. coli</i>    | Pigs    | unknown        | G       | CTX-M-1   | ST26         |                                  |
| ESBL-149 | <i>E. coli</i>    | Pigs    | unknown        | G       | CTX-M-1   | ST26         |                                  |
| ESBL-150 | <i>E. coli</i>    | Pigs    | unknown        | G       | CTX-M-1   | ST26         |                                  |
| ESBL-151 | <i>E. coli</i>    | Pigs    | unknown        | G       | CTX-M-1   | ST26         |                                  |
| 48       | <i>E. coli</i>    | Human   | unknown        | NL      | CTX-M-1   | ST3          |                                  |
| 53       | <i>E. coli</i>    | Human   | unknown        | NL      | CTX-M-1   | ST3          |                                  |
| ESBL-116 | <i>E. coli</i>    | Human   | 2009           | NL      | CTX-M-1   | ST3          |                                  |
| ESBL-305 | <i>E. coli</i>    | Poultry | 2008           | NL      | CTX-M-1   | ST3          | 105                              |
| ESBL-323 | <i>E. coli</i>    | Pigs    | 2008           | NL      | CTX-M-1   | ST3          | 105                              |
| ESBL-330 | <i>E. coli</i>    | Poultry | 2008           | NL      | CTX-M-1   | ST3          |                                  |
| ESBL-367 | <i>E. coli</i>    | Poultry | 2006           | NL      | CTX-M-1   | ST3          |                                  |
| ESBL-470 | <i>E. coli</i>    | Poultry | 2007           | NL      | CTX-M-1   | ST3          |                                  |
| ESBL-483 | <i>E. coli</i>    | Pigs    | 2008           | UK      | CTX-M-1   | ST3          |                                  |
| ESBL-53  | <i>E. coli</i>    | Human   | 2009           | NL      | CTX-M-1   | ST3          | 95                               |
| ESBL-593 | <i>E. coli</i>    | Poultry | 2008           | UK      | CTX-M-1   | ST3          |                                  |
| ESBL-594 | <i>E. coli</i>    | Poultry | 2008           | UK      | CTX-M-1   | ST3          |                                  |
| ESBL-597 | <i>E. coli</i>    | Poultry | 2008           | UK      | CTX-M-1   | ST3          |                                  |
| ESBL-602 | <i>E. coli</i>    | Poultry | 2008           | UK      | CTX-M-1   | ST3          |                                  |
| ESBL-605 | <i>E. coli</i>    | Poultry | 2008           | UK      | CTX-M-1   | ST3          |                                  |
| ESBL-606 | <i>E. coli</i>    | Poultry | 2008           | UK      | CTX-M-1   | ST3          |                                  |
| ESBL-607 | <i>E. coli</i>    | Poultry | 2008           | UK      | CTX-M-1   | ST3          |                                  |
| ESBL-608 | <i>E. coli</i>    | Poultry | 2008           | UK      | CTX-M-1   | ST3          |                                  |
| ESBL-609 | <i>E. coli</i>    | Poultry | 2008           | UK      | CTX-M-1   | ST3          |                                  |
| ESBL-613 | <i>E. coli</i>    | Poultry | 2008           | UK      | CTX-M-1   | ST3          |                                  |
| ESBL-615 | <i>E. coli</i>    | Poultry | 2006           | UK      | CTX-M-1   | ST3          |                                  |
| ESBL-618 | <i>E. coli</i>    | Poultry | 2006           | UK      | CTX-M-1   | ST3          |                                  |
| ESBL-625 | <i>E. coli</i>    | Poultry | 2006           | UK      | CTX-M-1   | ST3          |                                  |
| ESBL-642 | <i>E. coli</i>    | Poultry | 2006           | UK      | CTX-M-1   | ST3          |                                  |
| ESBL-654 | <i>E. coli</i>    | Poultry | 2007           | UK      | CTX-M-1   | ST3          |                                  |
| ESBL-749 | <i>E. coli</i>    | Human   | 2009           | UK      | CTX-M-1   | ST3          |                                  |
| ESBL-80  | <i>E. coli</i>    | Human   | 2009           | NL      | CTX-M-1   | ST3          |                                  |
| S186.27  | <i>Salmonella</i> | Poultry | 2006           | NL      | CTX-M-1   | ST3          |                                  |
| Sal-49   | <i>Salmonella</i> | Food    | 2005           | G       | CTX-M-1   | ST3          |                                  |
| Sal-85   | <i>Salmonella</i> | Pigs    | 2009           | G       | CTX-M-1   | ST3          |                                  |
| Sal-86   | <i>Salmonella</i> | Pigs    | 2009           | G       | CTX-M-1   | ST3          |                                  |
| Sal-87   | <i>Salmonella</i> | Pigs    | 2009           | G       | CTX-M-1   | ST3          |                                  |

|          |                   |         |         |    |         |      |     |
|----------|-------------------|---------|---------|----|---------|------|-----|
| Sal-93   | <i>Salmonella</i> | Pigs    | 2009    | G  | CTX-M-1 | ST3  |     |
| E39.51   | <i>E. coli</i>    | Poultry | 2006    | NL | CTX-M-1 | ST30 |     |
| ESBL-744 | <i>E. coli</i>    | Human   | 2009    | UK | CTX-M-1 | ST35 |     |
| NRS27    | <i>E. coli</i>    | Human   | 2009    | NL | CTX-M-1 | ST35 | 90  |
| Sal-64   | <i>Salmonella</i> | Poultry | 2009    | G  | CTX-M-1 | ST36 |     |
| ESBL-169 | <i>E. coli</i>    | Cattle  | 2009    | G  | CTX-M-1 | ST58 |     |
| ESBL-225 | <i>E. coli</i>    | Human   | unknown | G  | CTX-M-1 | ST58 |     |
| Sal-94   | <i>Salmonella</i> | Pigs    | 2009    | G  | CTX-M-1 | ST58 |     |
| ESBL-245 | <i>E. coli</i>    | Cattle  | 2009    | G  | CTX-M-1 | ST59 |     |
| Sal-71   | <i>Salmonella</i> | Horses  | 2005    | G  | CTX-M-1 | ST61 |     |
| Sal-72   | <i>Salmonella</i> | Horses  | 2005    | G  | CTX-M-1 | ST61 |     |
| Sal-73   | <i>Salmonella</i> | Horses  | 2005    | G  | CTX-M-1 | ST62 |     |
| ESBL-165 | <i>E. coli</i>    | Cattle  | unknown | G  | CTX-M-1 | ST63 |     |
| ESBL-172 | <i>E. coli</i>    | Cattle  | unknown | G  | CTX-M-1 | ST63 |     |
| ESBL-196 | <i>E. coli</i>    | Cattle  | 2009    | G  | CTX-M-1 | ST63 |     |
| ESBL-200 | <i>E. coli</i>    | Poultry | 2009    | G  | CTX-M-1 | ST63 |     |
| ESBL-238 | <i>E. coli</i>    | Cattle  | 2009    | G  | CTX-M-1 | ST63 |     |
| ESBL-324 | <i>E. coli</i>    | Pigs    | 2008    | NL | CTX-M-1 | ST64 | 105 |
| E38.27   | <i>E. coli</i>    | Poultry | 2006    | NL | CTX-M-1 | ST7  | 88  |
| E38.16   | <i>E. coli</i>    | Poultry | 2006    | NL | CTX-M-1 | ST7  |     |
| E38.49   | <i>E. coli</i>    | Poultry | 2006    | NL | CTX-M-1 | ST7  |     |
| E38.52   | <i>E. coli</i>    | Poultry | 2006    | NL | CTX-M-1 | ST7  |     |
| E38.53   | <i>E. coli</i>    | Poultry | 2006    | NL | CTX-M-1 | ST7  |     |
| E38.78   | <i>E. coli</i>    | Poultry | unknown | NL | CTX-M-1 | ST7  |     |
| E39.02   | <i>E. coli</i>    | Poultry | 2006    | NL | CTX-M-1 | ST7  |     |
| E39.05   | <i>E. coli</i>    | Poultry | 2006    | NL | CTX-M-1 | ST7  |     |
| E39.26   | <i>E. coli</i>    | Poultry | 2006    | NL | CTX-M-1 | ST7  |     |
| ESBL-100 | <i>E. coli</i>    | Human   | 2009    | NL | CTX-M-1 | ST7  | 100 |
| ESBL-112 | <i>E. coli</i>    | Human   | 2009    | NL | CTX-M-1 | ST7  | 100 |
| ESBL-119 | <i>E. coli</i>    | Human   | 2009    | NL | CTX-M-1 | ST7  | 100 |
| ESBL-195 | <i>E. coli</i>    | Poultry | unknown | G  | CTX-M-1 | ST7  |     |
| ESBL-201 | <i>E. coli</i>    | Poultry | 2009    | G  | CTX-M-1 | ST7  |     |
| ESBL-203 | <i>E. coli</i>    | Poultry | 2006    | NL | CTX-M-1 | ST7  |     |
| ESBL-208 | <i>E. coli</i>    | Poultry | 2006    | NL | CTX-M-1 | ST7  |     |
| ESBL-211 | <i>E. coli</i>    | Poultry | 2006    | NL | CTX-M-1 | ST7  |     |
| ESBL-213 | <i>E. coli</i>    | Poultry | 2006    | NL | CTX-M-1 | ST7  |     |
| ESBL-234 | <i>E. coli</i>    | Poultry | 2009    | G  | CTX-M-1 | ST7  |     |
| ESBL-235 | <i>E. coli</i>    | Cattle  | 2009    | G  | CTX-M-1 | ST7  |     |
| ESBL-240 | <i>E. coli</i>    | Cattle  | 2009    | G  | CTX-M-1 | ST7  |     |
| ESBL-270 | <i>E. coli</i>    | Poultry | 2007    | NL | CTX-M-1 | ST7  | 105 |
| ESBL-279 | <i>E. coli</i>    | Poultry | 2008    | NL | CTX-M-1 | ST7  |     |
| ESBL-28  | <i>E. coli</i>    | Human   | 2009    | NL | CTX-M-1 | ST7  |     |
| ESBL-281 | <i>E. coli</i>    | Poultry | 2008    | NL | CTX-M-1 | ST7  |     |
| ESBL-283 | <i>E. coli</i>    | Pigs    | 2008    | NL | CTX-M-1 | ST7  | 105 |
| ESBL-286 | <i>E. coli</i>    | Poultry | 2008    | NL | CTX-M-1 | ST7  | 110 |
| ESBL-288 | <i>E. coli</i>    | Poultry | 2008    | NL | CTX-M-1 | ST7  |     |
| ESBL-293 | <i>E. coli</i>    | Poultry | 2008    | NL | CTX-M-1 | ST7  |     |
| ESBL-297 | <i>E. coli</i>    | Poultry | 2008    | NL | CTX-M-1 | ST7  |     |
| ESBL-309 | <i>E. coli</i>    | Poultry | 2008    | NL | CTX-M-1 | ST7  |     |
| ESBL-311 | <i>E. coli</i>    | Poultry | 2008    | NL | CTX-M-1 | ST7  |     |
| ESBL-320 | <i>E. coli</i>    | Poultry | 2008    | NL | CTX-M-1 | ST7  |     |
| ESBL-333 | <i>E. coli</i>    | Poultry | 2008    | NL | CTX-M-1 | ST7  |     |
| ESBL-335 | <i>E. coli</i>    | Poultry | 2008    | NL | CTX-M-1 | ST7  |     |
| ESBL-345 | <i>E. coli</i>    | Poultry | 2008    | NL | CTX-M-1 | ST7  |     |
| ESBL-352 | <i>E. coli</i>    | Poultry | 2006    | NL | CTX-M-1 | ST7  |     |
| ESBL-357 | <i>E. coli</i>    | Poultry | 2007    | NL | CTX-M-1 | ST7  |     |
| ESBL-361 | <i>E. coli</i>    | Poultry | 2006    | NL | CTX-M-1 | ST7  |     |
| ESBL-375 | <i>E. coli</i>    | Poultry | 2007    | NL | CTX-M-1 | ST7  |     |
| ESBL-379 | <i>E. coli</i>    | Poultry | 2006    | NL | CTX-M-1 | ST7  |     |
| ESBL-402 | <i>E. coli</i>    | Poultry | 2007    | NL | CTX-M-1 | ST7  |     |
| ESBL-403 | <i>E. coli</i>    | Poultry | 2007    | NL | CTX-M-1 | ST7  |     |
| ESBL-404 | <i>E. coli</i>    | Poultry | 2007    | NL | CTX-M-1 | ST7  |     |
| ESBL-405 | <i>E. coli</i>    | Poultry | 2007    | NL | CTX-M-1 | ST7  |     |
| ESBL-413 | <i>E. coli</i>    | Poultry | 2007    | NL | CTX-M-1 | ST7  |     |
| ESBL-414 | <i>E. coli</i>    | Poultry | 2007    | NL | CTX-M-1 | ST7  |     |
| ESBL-446 | <i>E. coli</i>    | Poultry | 2006    | NL | CTX-M-1 | ST7  |     |
| ESBL-450 | <i>E. coli</i>    | Poultry | 2006    | NL | CTX-M-1 | ST7  |     |

|          |                   |         |         |    |               |            |     |
|----------|-------------------|---------|---------|----|---------------|------------|-----|
| ESBL-468 | <i>E. coli</i>    | Poultry | 2007    | NL | CTX-M-1       | ST7        |     |
| ESBL-61  | <i>E. coli</i>    | Human   | 2009    | NL | CTX-M-1       | ST7        | 105 |
| ESBL-67  | <i>E. coli</i>    | Human   | 2009    | NL | CTX-M-1       | ST7        |     |
| ESBL-97  | <i>E. coli</i>    | Human   | 2009    | NL | CTX-M-1       | ST7        |     |
| NRS-45   | <i>E. coli</i>    | Human   | 2009    | NL | CTX-M-1       | ST7        | 100 |
| S162.03  | <i>Salmonella</i> | Poultry | 2006    | NL | CTX-M-1       | ST7        |     |
| S175.77  | <i>Salmonella</i> | Poultry | 2006    | NL | CTX-M-1       | ST7        |     |
| S187.45  | <i>Salmonella</i> | Poultry | 2006    | NL | CTX-M-1       | ST7        |     |
| S187.46  | <i>Salmonella</i> | Poultry | 2006    | NL | CTX-M-1       | ST7        |     |
| Sal-12   | <i>Salmonella</i> | Poultry | 2008    | NL | CTX-M-1       | ST7        |     |
| Sal-17   | <i>Salmonella</i> | Poultry | 2008    | NL | CTX-M-1       | ST7        |     |
| Sal-25   | <i>Salmonella</i> | Poultry | 2008    | NL | CTX-M-1       | ST7        |     |
| Sal-26   | <i>Salmonella</i> | Poultry | 2008    | NL | CTX-M-1       | ST7        |     |
| Sal-27   | <i>Salmonella</i> | Poultry | 2008    | NL | CTX-M-1       | ST7        |     |
| Sal-28   | <i>Salmonella</i> | Poultry | 2008    | NL | CTX-M-1       | ST7        |     |
| Sal-34   | <i>Salmonella</i> | Poultry | 2008    | NL | CTX-M-1       | ST7        |     |
| Sal-35   | <i>Salmonella</i> | Poultry | 2008    | NL | CTX-M-1       | ST7        |     |
| Sal-39   | <i>Salmonella</i> | Poultry | 2008    | NL | CTX-M-1       | ST7        |     |
| Sal-41   | <i>Salmonella</i> | Poultry | 2008    | NL | CTX-M-1       | ST7        |     |
| Sal-44   | <i>Salmonella</i> | Poultry | 2008    | NL | CTX-M-1       | ST7        |     |
| Sal-50   | <i>Salmonella</i> | Poultry | 2006    | G  | CTX-M-1       | ST7        |     |
| Sal-53   | <i>Salmonella</i> | Poultry | 2006    | G  | CTX-M-1       | ST7        |     |
| Sal-56   | <i>Salmonella</i> | Poultry | 2008    | G  | CTX-M-1       | ST7        |     |
| Sal-57   | <i>Salmonella</i> | Poultry | 2008    | G  | CTX-M-1       | ST7        |     |
| Sal-59   | <i>Salmonella</i> | Poultry | 2009    | G  | CTX-M-1       | ST7        |     |
| Sal-6    | <i>Salmonella</i> | Poultry | 2008    | NL | CTX-M-1       | ST7        |     |
| Sal-60   | <i>Salmonella</i> | Poultry | 2009    | G  | CTX-M-1       | ST7        |     |
| Sal-61   | <i>Salmonella</i> | Poultry | 2009    | G  | CTX-M-1       | ST7        |     |
| Sal-63   | <i>Salmonella</i> | Poultry | 2009    | G  | CTX-M-1       | ST7        |     |
| Sal-82   | <i>Salmonella</i> | Poultry | 2008    | G  | CTX-M-1       | ST7        |     |
| Sal-95   | <i>Salmonella</i> | Sheep   | 2009    | G  | CTX-M-1       | ST7        |     |
| Sal-96   | <i>Salmonella</i> | Cattle  | 2009    | G  | CTX-M-1       | ST7        |     |
| Sal-97   | <i>Salmonella</i> | Poultry | 2009    | G  | CTX-M-1       | ST7        |     |
| NRS-42   | <i>E. coli</i>    | Human   | 2009    | NL | CTX-M-1       | ST7        |     |
| NRS-47   | <i>E. coli</i>    | Human   | 2009    | NL | CTX-M-1       | ST7        |     |
| NRS-33   | <i>E. coli</i>    | Human   | 2009    | NL | CTX-M-1       | ST7        |     |
| NRS-35   | <i>E. coli</i>    | Human   | 2009    | NL | CTX-M-1       | ST7        |     |
| NRS-36   | <i>E. coli</i>    | Human   | 2009    | NL | CTX-M-1       | ST7        |     |
| ESBL-518 | <i>E. coli</i>    | Cattle  | 2008    | UK | CTX-M-15      | incomplete |     |
| ESBL-503 | <i>E. coli</i>    | Cattle  | 2007    | UK | CTX-M-15      | ST16       |     |
| ESBL-506 | <i>E. coli</i>    | Cattle  | 2009    | UK | CTX-M-15      | ST16       |     |
| Sal-40   | <i>Salmonella</i> | Human   | 2008    | NL | CTX-M-15      | ST16       |     |
| ESBL-140 | <i>E. coli</i>    | Human   | 2009    | NL | CTX-M-15      | ST31       |     |
| ESBL-223 | <i>E. coli</i>    | Human   | unknown | G  | CTX-M-15      | ST31       |     |
| ESBL-4   | <i>E. coli</i>    | Human   | 2009    | NL | CTX-M-15      | ST31       | 90  |
| ESBL-43  | <i>E. coli</i>    | Human   | 2009    | NL | CTX-M-15      | ST31       |     |
| ESBL-46  | <i>E. coli</i>    | Human   | 2009    | NL | CTX-M-15      | ST31       |     |
| ESBL-499 | <i>E. coli</i>    | Cattle  | 2009    | UK | CTX-M-15      | ST31       |     |
| ESBL-517 | <i>E. coli</i>    | Cattle  | 2009    | UK | CTX-M-15      | ST31       |     |
| ESBL-545 | <i>E. coli</i>    | Cattle  | 2009    | UK | CTX-M-15      | ST31       |     |
| ESBL-557 | <i>E. coli</i>    | Cattle  | 2007    | UK | CTX-M-15      | ST31       |     |
| ESBL-558 | <i>E. coli</i>    | Cattle  | 2009    | UK | CTX-M-15      | ST31       |     |
| ESBL-582 | <i>E. coli</i>    | Cattle  | 2008    | UK | CTX-M-15      | ST31       |     |
| ESBL-696 | <i>E. coli</i>    | Human   | 2009    | UK | CTX-M-15      | ST31       |     |
| ESBL-768 | <i>E. coli</i>    | Human   | 2009    | UK | CTX-M-15      | ST31       |     |
| ESBL-12  | <i>E. coli</i>    | Human   | 2009    | NL | CTX-M-15      | ST37       | 100 |
| ESBL-498 | <i>E. coli</i>    | Cattle  | 2008    | UK | CTX-M-15      | ST37       |     |
| ESBL-500 | <i>E. coli</i>    | Cattle  | 2006    | UK | CTX-M-15      | ST37       |     |
| ESBL-598 | <i>E. coli</i>    | Poultry | 2008    | UK | CTX-M-3       | ST3        |     |
| ESBL-101 | <i>E. coli</i>    | Human   | 2009    | NL | CTX-M-3       | ST57       |     |
| ESBL-221 | <i>E. coli</i>    | Human   | unknown | G  | CTX-M-3       | ST57       |     |
| E17.16   | <i>E. coli</i>    | Poultry | 2004    | NL | intI1***      | ST24       |     |
| E20.06   | <i>E. coli</i>    | Poultry | 2004    | NL | intI1         | ST50       |     |
| E23.68   | <i>E. coli</i>    | Poultry | 2004    | NL | intI1         | ST26       |     |
| S102.21  | <i>Salmonella</i> | Poultry | unknown | NL | intI1         | ST26       |     |
| S127.29  | <i>Salmonella</i> | Poultry | unknown | NL | intI1         | ST29       |     |
| E24.24   | <i>E. coli</i>    | Poultry | unknown | NL | intI1 (TEM-1) | ST3        |     |

|          |                   |         |         |    |        |            |     |
|----------|-------------------|---------|---------|----|--------|------------|-----|
| ESBL-77  | <i>E. coli</i>    | Human   | 2009    | NL | SHV-12 | ST25       | 105 |
| ESBL-78  | <i>E. coli</i>    | Human   | 2009    | NL | SHV-12 | ST3        |     |
| Sal-66   | <i>Salmonella</i> | Poultry | 2009    | G  | SHV-12 | ST95       |     |
| S124.61  | <i>Salmonella</i> | Poultry | unknown | NL | TEM-1  | ST3        |     |
| S168.68  | <i>Salmonella</i> | Poultry | unknown | NL | TEM-1  | ST3        |     |
| S177.41  | <i>Salmonella</i> | Poultry | unknown | NL | TEM-1  | ST3        |     |
| S171.70  | <i>Salmonella</i> | Poultry | unknown | NL | TEM-20 | ST3        |     |
| S180.34  | <i>Salmonella</i> | Poultry | unknown | NL | TEM-20 | ST3        |     |
| S502.56  | <i>Salmonella</i> | Poultry | unknown | NL | TEM-20 | ST3        |     |
| S503.59  | <i>Salmonella</i> | Poultry | unknown | NL | TEM-20 | ST3        |     |
| ESBL-362 | <i>E. coli</i>    | Poultry | 2006    | NL | TEM-52 | incomplete |     |
| ESBL-376 | <i>E. coli</i>    | Poultry | 2007    | NL | TEM-52 | incomplete |     |
| E38.34   | <i>E. coli</i>    | Poultry | 2009    | NL | TEM-52 | ST10       | 97  |
| E39.76   | <i>E. coli</i>    | Poultry | 2006    | NL | TEM-52 | ST10       |     |
| ESBL-13  | <i>E. coli</i>    | Human   | 2009    | NL | TEM-52 | ST10       | 95  |
| ESBL-478 | <i>E. coli</i>    | Poultry | 2007    | NL | TEM-52 | ST10       |     |
| S162.19  | <i>Salmonella</i> | Poultry | 2006    | NL | TEM-52 | ST10       |     |
| S166.01  | <i>Salmonella</i> | Poultry | 2006    | NL | TEM-52 | ST10       |     |
| S166.22  | <i>Salmonella</i> | Poultry | 2006    | NL | TEM-52 | ST10       |     |
| S173.44  | <i>Salmonella</i> | Poultry | 2006    | NL | TEM-52 | ST10       |     |
| NRS-17   | <i>E. coli</i>    | Human   | 2009    | NL | TEM-52 | ST10       |     |
| ESBL-412 | <i>E. coli</i>    | Poultry | 2007    | NL | TEM-52 | ST21       |     |
| S178.57  | <i>Salmonella</i> | Poultry | unknown | NL | TEM-52 | ST27       |     |
| S188.05  | <i>Salmonella</i> | Poultry | unknown | NL | TEM-52 | ST27       |     |
| ESBL-117 | <i>E. coli</i>    | Human   | 2009    | NL | TEM-52 | ST36       | 90  |
| ESBL-14  | <i>E. coli</i>    | Human   | 2009    | NL | TEM-52 | ST36       | 90  |
| ESBL-239 | <i>E. coli</i>    | Poultry | 2009    | G  | TEM-52 | ST36       |     |
| ESBL-272 | <i>E. coli</i>    | Poultry | 2007    | NL | TEM-52 | ST36       | 90  |
| ESBL-30  | <i>E. coli</i>    | Human   | 2009    | NL | TEM-52 | ST36       |     |
| ESBL-307 | <i>E. coli</i>    | Poultry | 2008    | NL | TEM-52 | ST36       | 90  |
| ESBL-351 | <i>E. coli</i>    | Poultry | 2006    | NL | TEM-52 | ST36       |     |
| ESBL-40  | <i>E. coli</i>    | Human   | 2009    | NL | TEM-52 | ST36       | 95  |
| ESBL-407 | <i>E. coli</i>    | Poultry | 2007    | NL | TEM-52 | ST36       |     |
| ESBL-408 | <i>E. coli</i>    | Poultry | 2007    | NL | TEM-52 | ST36       |     |
| ESBL-431 | <i>E. coli</i>    | Poultry | 2006    | NL | TEM-52 | ST36       |     |
| ESBL-436 | <i>E. coli</i>    | Poultry | 2006    | NL | TEM-52 | ST36       |     |
| ESBL-444 | <i>E. coli</i>    | Poultry | 2006    | NL | TEM-52 | ST36       |     |
| ESBL-467 | <i>E. coli</i>    | Poultry | 2007    | NL | TEM-52 | ST36       |     |
| ESBL-471 | <i>E. coli</i>    | Cattle  | 2007    | NL | TEM-52 | ST36       |     |
| ESBL-472 | <i>E. coli</i>    | Poultry | 2007    | NL | TEM-52 | ST36       |     |
| ESBL-71  | <i>E. coli</i>    | Human   | 2009    | NL | TEM-52 | ST36       | 95  |
| ESBL-81  | <i>E. coli</i>    | Human   | 2009    | NL | TEM-52 | ST36       |     |
| ESBL-92  | <i>E. coli</i>    | Human   | 2009    | NL | TEM-52 | ST36       |     |
| NRS40    | <i>E. coli</i>    | Human   | 2009    | NL | TEM-52 | ST36       | 90  |
| Sal-22   | <i>Salmonella</i> | Poultry | 2008    | NL | TEM-52 | ST36       |     |
| Sal-30   | <i>Salmonella</i> | Poultry | 2008    | NL | TEM-52 | ST36       |     |
| Sal-31   | <i>Salmonella</i> | Poultry | 2008    | NL | TEM-52 | ST36       |     |
| Sal-37   | <i>Salmonella</i> | Poultry | 2008    | NL | TEM-52 | ST36       |     |
| Sal-45   | <i>Salmonella</i> | Poultry | 2008    | NL | TEM-52 | ST36       |     |
| Sal-47   | <i>Salmonella</i> | Poultry | 2008    | NL | TEM-52 | ST36       |     |
| Sal-65   | <i>Salmonella</i> | Poultry | 2009    | G  | TEM-52 | ST36       |     |
| Sal-78   | <i>Salmonella</i> | Poultry | 2006    | G  | TEM-52 | ST36       |     |
| NRS-41   | <i>E. coli</i>    | Human   | 2009    | NL | TEM-52 | ST36       |     |
| NRS-20   | <i>E. coli</i>    | Human   | 2009    | NL | TEM-52 | ST36       |     |
| NRS-25   | <i>E. coli</i>    | Human   | 2009    | NL | TEM-52 | ST36       |     |
| NRS51    | <i>E. coli</i>    | Human   | 2009    | NL | TEM-52 | ST36       |     |
| Sal-54   | <i>Salmonella</i> |         | 2007    | G  | TEM-52 | ST60       |     |

selected for sequence analysis

\* of IncI1 plasmids

\*\* determined as described in Materials and Methods

\*\*\* IncI1 plasmids not containing an ESBL/AmpC gene but carrying a class I integron were selected for comparison

Table S2

## Representative accessory cassettes

| Key      | ESBL/AmpC             | ST/CC     | representative accessory cassettes                                                                                                                                                                                                                                                                                                                                                                                                           |
|----------|-----------------------|-----------|----------------------------------------------------------------------------------------------------------------------------------------------------------------------------------------------------------------------------------------------------------------------------------------------------------------------------------------------------------------------------------------------------------------------------------------------|
| ESBL-100 | CTX-M-1<br>lib15      | ST7/CC7   | <b>repYZ</b> ; <i>tnpA</i> ; <i>hyp</i> gene; <i>sul2</i> ; <i>glmM</i> ; <i>tnpA</i> ; <b>relBE</b> ; <i>hyp</i> gene; <i>bla</i> CTX-M-1; <i>ISEcp1</i> ; <b>yacc</b> *** ..... <i>intl1</i> ; <i>trunc. aadA</i> ; <i>dfrA1</i> ; <i>aadA1</i> ; <i>qacEdelta1</i> ; <i>sul1</i> *..                                                                                                                                                      |
| ESBL-315 | CTX-M-1               | IC**/-    | <b>repYZ</b> ; <i>tnpA</i> ; <i>hyp</i> gene; <i>sul2</i> ; <i>glmM</i> ; <i>tnpA</i> ; <b>relBE</b> ; <i>hyp</i> gene; <i>bla</i> CTX-M-1; <i>ICEcp1</i> ; <b>yacc</b> <b>imm</b> ; <i>hyp</i> gene; <i>hyp</i> gene; <i>hyp</i> gene; <i>sul1</i> ; <i>qacEdelta1</i> ; <i>aadA</i> ; <i>dhfr</i> ; <i>aadA1</i> ; <i>intl1</i> ; <i>tnpR</i> ; <i>tnpA</i> ; <i>hyp</i> gene; <i>hyp</i> gene; <i>hyp</i> gene; <i>tnpR</i> ; <b>parA</b> |
| ESBL-305 | CTX-M-1<br>lib16      | ST3/CC3   | <b>repYZ</b> ; <i>tnpA</i> ; <i>hyp</i> gene; <i>tnpA</i> ; <i>tnpR</i> ; <i>tnpM</i> ; <i>intl1</i> ; <i>dfrA17</i> ; <i>aadA5</i> ; <i>tnpA</i> ; <i>insD2</i> ; <i>hyp</i> gene; <i>sul2</i> ; <i>glmM</i> ; <i>tnpA</i> ; <b>relB</b> <i>ISEcp1</i> ; <i>bla</i> CTX-M-1; <i>hyp</i> gene in shufflon                                                                                                                                    |
| ESBL-78  | SHV-12<br>lib3-E78    | ST3/CC3   | <b>repYZ</b> ; <i>tnpA</i> ; <i>hyp</i> gene; <i>tnpA</i> ; <i>tnpR</i> ; <i>tnpM</i> ..... <i>estX</i> ; <i>aadA2</i> ; <i>cmIA</i> ; <i>aadA1</i> ; <i>qacH</i> ; <i>tnpA</i> ; <i>sul3</i> ; <i>hyp</i> gene; <i>yusZ</i> ; <i>hyp</i> gene; <i>tnpA</i> ; <i>bla</i> SHV-12; <i>transcrip regulator</i> gene; <i>mcp</i> ; <i>tnpR</i> ; <i>tnpA</i> ; <b>relB</b>                                                                       |
| ESBL-12  | CTX-M-15<br>lib08     | ST37/-    | <b>yagA</b> ; <i>tnpA</i> ; <i>bla</i> CTX-M-15; <i>tnpA</i> ; <i>aac3</i> ; <i>hyp</i> gene; <i>hyp</i> gene; <i>hyp</i> gene; <i>hyp</i> gene; <i>tnpA</i> ; <i>bla</i> TEM-1; <b>yagA</b>                                                                                                                                                                                                                                                 |
| ESBL-4   | CTX-M-15<br>lib3-E499 | ST31/CC31 | <b>yagA</b> ; <i>tnpA</i> ; <i>hyp</i> gene; <i>bla</i> CTX-M-15; <i>ISEcp1</i> ; <i>tnpA</i> ; <i>tnpA</i> ; <i>tnpR</i> ; <i>bla</i> TEM-1; <b>impB</b>                                                                                                                                                                                                                                                                                    |
| NRS27    | CTX-M-1<br>lib3-NRS27 | ST35/-    | <b>yagA</b> ; <i>bla</i> TEM33; <i>tnpA</i> ; <i>tnpR</i> ; <b>impB</b> <b>pilM</b> ; <i>hyp</i> gene; <i>bla</i> CTX-M-1; <i>ISEcp1</i> <i>tnpA</i> ; <b>raC</b>                                                                                                                                                                                                                                                                            |
| ESBL-318 | CMY-2<br>lib3-E318    | ST12/CC12 | <b>yagA</b> ; <i>ISEcp1</i> ; <i>bla</i> CMY-2; <i>blc</i> ; <i>sugE</i> ; <i>hyp</i> gene; <b>yagA</b>                                                                                                                                                                                                                                                                                                                                      |
| ESBL-272 | TEM-52<br>lib12       | ST36/CC5  | <b>yafB</b> ; <i>tnpA</i> ; <i>tnpR</i> ; <i>bla</i> TEM52; <b>vagD</b>                                                                                                                                                                                                                                                                                                                                                                      |
| E23.68   | intl1<br>lib03        | ST26/CC26 | <b>yacc</b> ; <i>merR</i> ; <i>merT</i> ; <i>merP</i> ; <i>merC</i> ; <i>merA</i> ; <i>bla</i> TEM-1; <i>tnpR</i> ; <i>tnpA</i> ; <i>merA</i> ; <i>merD</i> ; <i>merE</i> ; <i>urf2</i> ; <i>tniA</i> ; <i>tniB</i> ; <i>hyp</i> gene; <i>sul1</i> ; <i>qacEdelta1</i> ; <i>aadA1</i> ; <i>dfrA1</i> ; <i>trunc. aadA</i> ; <i>intl1</i> ; <i>tnpM</i> ; <i>tnpR</i> ; <i>tnpA</i> ; <b>yadA</b>                                             |

\*.....: location of accessory module unknown

\*\* incomplete ST

\*\*\* genes indicated in bold refer to Collb-P9 genes
